# Supplementary material for: Color-Coded Front-of-Pack Nutrition Labels—An Option for US Packaged Foods?
Source: PubMed Central journal article supplement (PMC5452210; doi:10.3390/nu9050480), 2017-05-10
Supplement: nutrients-09-00480-s001.pdf [file nutrients-09-00480-s001.pdf]

Supplementary tables

**Supplementary Table 1: Global Food Monitoring Group food categorization system**

| <b>Food group</b>                       | <b>Food category</b>                                                                               | <b>Description</b>                                                                                      |
|-----------------------------------------|----------------------------------------------------------------------------------------------------|---------------------------------------------------------------------------------------------------------|
| <b>Beverages</b>                        | Juices                                                                                             | Fresh and ambient fruit and vegetable juices                                                            |
|                                         | Soft drinks                                                                                        | Sugar-sweetened and artificially-sweetened soft drinks                                                  |
|                                         | Electrolyte drinks                                                                                 | Sports electrolyte drinks                                                                               |
|                                         | Waters                                                                                             | Plain and flavored waters                                                                               |
|                                         | Coffee and tea                                                                                     | All coffee and tea products                                                                             |
|                                         | Powdered beverages                                                                                 | All beverage mixes                                                                                      |
| <b>Bread and bakery products</b>        | Bread                                                                                              | White, wholemeal and mixed grain/seed sliced bread and rolls                                            |
|                                         |                                                                                                    | Fruit bread and fruit-based muffins/rolls                                                               |
|                                         |                                                                                                    | Wraps and other flatbread products                                                                      |
|                                         |                                                                                                    | Turkish pide, bagels, English-style muffins, crumpets, pizza bases and other plain bread-based products |
|                                         | Biscuits and cookies                                                                               | Filled and unfilled sweet biscuits                                                                      |
| Cakes, muffins and pastry               | Flavored and plain crisp bread and crackers                                                        |                                                                                                         |
|                                         | Scones, pikelets, doughnuts, cakes, sweet buns, pancakes, crepes, muffins (cake-style), slices etc |                                                                                                         |
| <b>Cereal and cereal-based products</b> | Breakfast cereal                                                                                   | Ready to eat breakfast cereals                                                                          |
|                                         |                                                                                                    | Oats and other breakfast cereals that require heating                                                   |
|                                         |                                                                                                    | Other processed cereals (e.g. bran)                                                                     |
|                                         | Cereal and nut-based bars                                                                          | Plain, chocolate-topped and yoghurt-topped cereal-based bars                                            |
|                                         |                                                                                                    | Noodles                                                                                                 |
|                                         | Pasta                                                                                              | Savory/flavored dry noodle-based dishes                                                                 |
|                                         |                                                                                                    | Canned and ambient pasta and sauce (with and without meat) products (excludes frozen ready meals)       |
|                                         |                                                                                                    | Packaged fresh pasta with sauce                                                                         |
|                                         |                                                                                                    | Savory/flavored dry pasta-based side dishes                                                             |
|                                         | Rice                                                                                               | Plain dry pasta                                                                                         |
| Plain rice                              |                                                                                                    |                                                                                                         |
| Savory rice-based side dishes           |                                                                                                    |                                                                                                         |
| Other breakfast products                | All breakfast products not included in “Breakfast cereal”                                          |                                                                                                         |
| Other cereal products                   | Flour and other unprocessed cereals (e.g. polenta, cous cous, bread crumbs, yeast)                 |                                                                                                         |
| <b>Confectionery</b>                    | Chocolate and sweets                                                                               | Chocolate-based confectionery, sugar-based confectionery                                                |
|                                         | Chewing gum                                                                                        | All sugar-sweetened and sugar-free chewing gums and bubble gum products                                 |
| <b>Convenience foods</b>                | Pizza                                                                                              | Frozen and refrigerated pre-packed pizzas                                                               |

|                                            |                                    |                                                                                                                                                                                                                                                                                 |
|--------------------------------------------|------------------------------------|---------------------------------------------------------------------------------------------------------------------------------------------------------------------------------------------------------------------------------------------------------------------------------|
|                                            | Soup                               | Canned, chilled and ambient soup products                                                                                                                                                                                                                                       |
|                                            | Ready meals                        | Frozen, chilled and ambient pre-prepared meals                                                                                                                                                                                                                                  |
|                                            | Meal kits                          | Kits with ingredients to put meals together                                                                                                                                                                                                                                     |
|                                            | Pre-prepared salads and sandwiches | Chilled pre-prepared salads and sandwiches                                                                                                                                                                                                                                      |
|                                            | Other convenience foods            | Other pre-prepared foods not included in above categories                                                                                                                                                                                                                       |
| <b>Dairy</b>                               | Cheese                             | Feta, haloumi, parmesan and other high-salt cheeses<br>All types of full and reduced fat cheddar/Colby etc cheese including shredded, block or sliced<br>Soft cheeses such as cream cheese, ricotta and cottage cheese<br>Processed cheese slices and products                  |
|                                            | Cream                              | Thickened, sour and regular cream products                                                                                                                                                                                                                                      |
|                                            | Dairy desserts                     | Dairy-based desserts (e.g. custards, rice puddings)<br>Dairy-based dessert mixes (e.g. powders)                                                                                                                                                                                 |
|                                            | Ice cream and edible ices          | Dairy and non dairy-based ice cream varieties and edible ices                                                                                                                                                                                                                   |
|                                            | Milk products                      | Flavored and unflavored dairy milk products<br>Flavored and unflavored soymilks<br>Flavored and unflavored oat, almond and other milks<br>Condensed, evaporated and powdered milk products (including coconut milk)                                                             |
|                                            | Yoghurt products                   | Fruit, flavored and natural yoghurts (full fat, reduced fat and skim varieties) including yoghurt drinks<br>Salted and unsalted butter and margarine products                                                                                                                   |
| <b>Edible oils</b>                         |                                    |                                                                                                                                                                                                                                                                                 |
| <b>Fruit, vegetables, nuts and legumes</b> | Fruit                              | Dried fruit products including coconut<br>Fruit-based bars<br>Fruit products canned in juice or syrup<br>Fruit gels, fruits in jelly and fruit puree                                                                                                                            |
|                                            | Jam and fruit spreads              | Jams, marmalades and other preserves                                                                                                                                                                                                                                            |
|                                            | Nuts and seeds                     | Salted and unsalted nuts and seeds                                                                                                                                                                                                                                              |
|                                            | Vegetables                         | Canned tomato products<br>Canned beans and peas<br>Baked beans in tomato sauce (with and without additions)<br>Canned creamed, plain and sweet corn<br>All other canned vegetables<br>Pickled vegetable and olive products<br>Frozen potato-based products<br>Frozen vegetables |
| <b>Meat and meat alternatives</b>          | Meat alternatives                  | Plain tofu and other meat-free alternatives<br>Meat-free products (e.g. meat-free sausages)                                                                                                                                                                                     |
|                                            | Processed meat                     | Pre-packed bacon products<br>Beef, pork, chicken and lamb sausages and chilled hot dogs<br>Pre-packaged sliced deli meats                                                                                                                                                       |

|                                      |                                |                                                                                                                                                                                                                                                                                                                                                                                                                                                          |
|--------------------------------------|--------------------------------|----------------------------------------------------------------------------------------------------------------------------------------------------------------------------------------------------------------------------------------------------------------------------------------------------------------------------------------------------------------------------------------------------------------------------------------------------------|
|                                      |                                | Pre-packaged salami and cured meats<br>Beef, pork, chicken and lamb meat burgers<br>Canned meat products (excluding soup and pasta)<br>Frozen meat pies, sausage rolls and other meat-based pastry products                                                                                                                                                                                                                                              |
| <b>Sauces, dressings and spreads</b> | Mayonnaise and salad dressings | Full and low-fat mayonnaise<br>Oil-based, vinegar-based and other types of salad dressing                                                                                                                                                                                                                                                                                                                                                                |
|                                      | Sauces                         | Table sauces such as tomato sauces and ketchups, sweet chilli, BBQ sauces<br>Steak, HP and Worcestershire sauces<br>Soy, fish, oyster and other Asian high-salt sauces<br>Mustard products<br>Marinade products<br>Meat accompaniments (e.g. apple, cranberry and mint sauces)<br>Plain and flavored tomato paste products<br>Asian and Indian flavored powdered, ambient and liquid meal-based sauces<br>Ambient and fresh pasta sauces<br>Recipe bases |
|                                      | Spreads                        | Liquid and powdered gravies and stock<br>Crunchy and smooth salted and unsalted peanut butter<br>Relishes, chutneys and pickles<br>Other savory spreads (e.g. vegetable spreads)<br>Pâté spreads<br>Sweet spreads<br>Yeast-extract spreads (e.g. vegemite)<br>Chilled and ambient dips and salsa                                                                                                                                                         |
| <b>Seafood and seafood products</b>  | Canned seafood                 | All varieties of plain and flavored canned seafood                                                                                                                                                                                                                                                                                                                                                                                                       |
|                                      | Chilled and frozen seafood     | Chilled processed fish products (e.g. smoked salmon)<br>Coated frozen fish products (e.g. fish fingers) and uncoated fish products                                                                                                                                                                                                                                                                                                                       |
| <b>Snack foods</b>                   |                                | Plain and flavored potato crisps<br>Plain and flavored snack foods<br>Extruded snacks (e.g. cheesy snacks)<br>Plain and flavored corn chips<br>Pretzels, popcorn and other snackfoods<br>Other fried snackfoods (e.g. plantain chips)<br>All varieties of cracker-based snack packs                                                                                                                                                                      |

**Supplementary table 2: Traffic light label aggregate scores for US products**

| <b>Food category</b>                | <b>n</b>       | <b>Traffic light label aggregate score</b> |                    |                   |
|-------------------------------------|----------------|--------------------------------------------|--------------------|-------------------|
|                                     |                | <b>% healthy</b>                           | <b>% unhealthy</b> | <b>Mean score</b> |
| Beverages                           | 7,075          | 81.1                                       | 18.9               | 6.3               |
| Bread and bakery products           | 26,804         | 9.7                                        | 90.3               | 9.8               |
| Cereal and cereal products          | 8,855          | 19.1                                       | 80.9               | 8.6               |
| Confectionery                       | 15,394         | 27.6                                       | 72.4               | 8.9               |
| Convenience foods                   | 14,375         | 35.2                                       | 64.8               | 7.7               |
| Dairy                               | 25,815         | 25.4                                       | 74.6               | 8.5               |
| Edible oils and emulsions           | 357            | 0.3                                        | 99.7               | 9.7               |
| Seafood and seafood products        | 4,876          | 54.3                                       | 45.7               | 6.8               |
| Foods for specific dietary use      | 2,053          | 11.1                                       | 88.9               | 9.8               |
| Fruit, vegetables, nuts and legumes | 26,861         | 55.9                                       | 44.1               | 7.1               |
| Meat and meat products              | 12,374         | 23.4                                       | 76.6               | 8.3               |
| Sauces, dressings and spreads       | 18,805         | 28.7                                       | 71.3               | 8.2               |
| Snack foods                         | 11,464         | 5.3                                        | 94.7               | 9.6               |
| <b>TOTAL FOOD</b>                   | <b>163,222</b> | <b>27.5</b>                                | <b>72.5</b>        | <b>8.5</b>        |
| <b>TOTAL BEVERAGE</b>               | <b>11,886</b>  | <b>66.1</b>                                | <b>33.9</b>        | <b>6.6</b>        |
| <b>TOTAL</b>                        | <b>175108</b>  | <b>30.1</b>                                | <b>69.9</b>        | <b>8.4</b>        |

**Supplementary Table 3: Proportion of US food and beverage products meeting each color coded criteria by food subcategory**

| Food category                     | Total<br>n | Total Fat  |            |          | Saturated Fat |            |          | Total Sugars |            |          | Sodium     |            |          |
|-----------------------------------|------------|------------|------------|----------|---------------|------------|----------|--------------|------------|----------|------------|------------|----------|
|                                   |            | AMBER<br>% | GREEN<br>% | RED<br>% | AMBER<br>%    | GREEN<br>% | RED<br>% | AMBER<br>%   | GREEN<br>% | RED<br>% | AMBER<br>% | GREEN<br>% | RED<br>% |
| <b>Beverages</b>                  | 7075       | 7          | 86         | 7        | 3             | 87         | 10       | 14           | 13         | 74       | 3          | 85         | 13       |
| Juices                            | 3,612      | 2          | 98         | 0        | 1             | 98         | 0        | 14           | 6          | 80       | 0          | 94         | 5        |
| Coffee and tea                    | 827        | 4          | 93         | 3        | 5             | 89         | 5        | 13           | 23         | 64       | 1          | 97         | 2        |
| Electrolyte drinks                | 41         | 0          | 100        | 0        | 0             | 100        | 0        | 41           | 15         | 44       | 0          | 88         | 12       |
| Powdered drinks                   | 1,248      | 27         | 36         | 38       | 6             | 46         | 48       | 4            | 12         | 84       | 12         | 36         | 52       |
| Soft drinks                       | 299        | 0          | 100        | 0        | 0             | 100        | 0        | 5            | 8          | 87       | 1          | 99         | 0        |
| Waters                            | 584        | 2          | 98         | 1        | 1             | 98         | 1        | 28           | 35         | 37       | 0          | 98         | 1        |
| Other beverages                   | 464        | 8          | 88         | 4        | 3             | 91         | 6        | 24           | 21         | 55       | 3          | 93         | 4        |
| <b>Bread and bakery products</b>  | 26,804     | 18         | 13         | 69       | 6             | 31         | 63       | 15           | 25         | 60       | 27         | 10         | 64       |
| Biscuits and crackers             | 11,961     | 8          | 5          | 88       | 6             | 19         | 75       | 8            | 19         | 73       | 29         | 13         | 58       |
| Bread                             | 6,719      | 45         | 38         | 17       | 7             | 76         | 17       | 34           | 57         | 9        | 8          | 6          | 87       |
| Cakes, muffins and pastry         | 8,124      | 11         | 5          | 84       | 5             | 13         | 82       | 8            | 9          | 83       | 39         | 10         | 52       |
| <b>Cereal and cereal products</b> | 8,855      | 37         | 22         | 41       | 12            | 53         | 35       | 11           | 31         | 58       | 23         | 23         | 54       |
| Breakfast cereal                  | 3,938      | 52         | 19         | 29       | 12            | 71         | 17       | 8            | 16         | 76       | 19         | 31         | 51       |
| Cereal and nut-based bars         | 2,091      | 16         | 2          | 82       | 13            | 19         | 68       | 3            | 3          | 95       | 47         | 21         | 31       |
| Noodles                           | 672        | 36         | 42         | 22       | 16            | 63         | 21       | 15           | 79         | 6        | 9          | 43         | 47       |
| Pasta                             | 1,048      | 41         | 31         | 28       | 12            | 40         | 48       | 41           | 55         | 4        | 8          | 2          | 90       |
| Rice                              | 581        | 22         | 75         | 3        | 4             | 92         | 4        | 7            | 91         | 2        | 7          | 10         | 83       |
| Other breakfast products          | 479        | 28         | 7          | 65       | 11            | 20         | 68       | 12           | 71         | 17       | 15         | 3          | 81       |
| Other cereal products             | 46         | 11         | 85         | 4        | 4             | 89         | 7        | 2            | 98         | 0        | 28         | 39         | 33       |
| <b>Confectionery</b>              | 15,394     | 6          | 32         | 62       | 1             | 34         | 65       | 1            | 2          | 97       | 21         | 72         | 7        |
| Chewing gum                       | 134        | 5          | 90         | 4        | 1             | 91         | 7        | 1            | 15         | 84       | 2          | 97         | 1        |
| Chocolate and sweets              | 15,260     | 6          | 31         | 63       | 1             | 33         | 65       | 1            | 2          | 97       | 21         | 72         | 8        |
| <b>Convenience foods</b>          | 14,375     | 32         | 35         | 33       | 13            | 50         | 37       | 11           | 86         | 4        | 26         | 5          | 69       |
| Meal kits                         | 162        | 19         | 64         | 18       | 8             | 78         | 14       | 4            | 61         | 35       | 2          | 2          | 96       |
| Pizza                             | 1,810      | 28         | 0          | 72       | 9             | 2          | 89       | 10           | 90         | 0        | 3          | 0          | 97       |

| Food category                              | Total<br>n    | Total Fat  |            |            | Saturated Fat |            |           | Total Sugars |            |           | Sodium     |            |           |
|--------------------------------------------|---------------|------------|------------|------------|---------------|------------|-----------|--------------|------------|-----------|------------|------------|-----------|
|                                            |               | AMBER<br>% | GREEN<br>% | RED<br>%   | AMBER<br>%    | GREEN<br>% | RED<br>%  | AMBER<br>%   | GREEN<br>% | RED<br>%  | AMBER<br>% | GREEN<br>% | RED<br>%  |
| Pre-prepared salads and sandwiches         | 1,915         | 35         | 10         | 55         | 22            | 35         | 43        | 21           | 74         | 4         | 18         | 7          | 75        |
| Ready meals                                | 6,483         | 42         | 29         | 29         | 17            | 48         | 36        | 9            | 86         | 4         | 30         | 5          | 65        |
| Soup                                       | 3,639         | 19         | 73         | 7          | 5             | 84         | 11        | 8            | 89         | 3         | 36         | 6          | 58        |
| Other convenience foods                    | 366           | 19         | 40         | 41         | 8             | 57         | 36        | 11           | 81         | 7         | 15         | 8          | 77        |
| <b>Dairy</b>                               | <i>25,815</i> | <i>16</i>  | <i>27</i>  | <i>57</i>  | <i>6</i>      | <i>28</i>  | <i>66</i> | <i>20</i>    | <i>41</i>  | <i>39</i> | <i>9</i>   | <i>54</i>  | <i>37</i> |
| Cheese                                     | 10,129        | 4          | 5          | 91         | 1             | 6          | 94        | 9            | 88         | 3         | 8          | 2          | 90        |
| Cream                                      | 1,511         | 11         | 10         | 79         | 0             | 31         | 69        | 27           | 36         | 37        | 15         | 80         | 5         |
| Desserts                                   | 566           | 25         | 69         | 6          | 31            | 57         | 12        | 5            | 8          | 87        | 53         | 33         | 14        |
| Ice cream and edible ices                  | 6,473         | 20         | 19         | 62         | 5             | 18         | 76        | 4            | 2          | 95        | 15         | 85         | 1         |
| Milk products                              | 3,448         | 46         | 47         | 7          | 16            | 53         | 32        | 54           | 13         | 33        | 3          | 94         | 3         |
| Yoghurt products                           | 3,688         | 16         | 83         | 1          | 12            | 79         | 9         | 43           | 14         | 42        | 1          | 99         | 1         |
| <b>Edible oils</b>                         | <i>357</i>    | <i>0</i>   | <i>0</i>   | <i>100</i> | <i>0</i>      | <i>0</i>   | <i>99</i> | <i>4</i>     | <i>90</i>  | <i>6</i>  | <i>5</i>   | <i>22</i>  | <i>73</i> |
| <b>Fruit, vegetables, nuts and legumes</b> | <i>26,840</i> | <i>4</i>   | <i>58</i>  | <i>37</i>  | <i>2</i>      | <i>63</i>  | <i>34</i> | <i>13</i>    | <i>56</i>  | <i>31</i> | <i>22</i>  | <i>48</i>  | <i>30</i> |
| Fruit                                      | 5,528         | 4          | 85         | 10         | 1             | 89         | 10        | 20           | 4          | 75        | 7          | 89         | 4         |
| Jam and fruit spreads                      | 945           | 3          | 95         | 3          | 1             | 97         | 3         | 2            | 4          | 94        | 5          | 90         | 5         |
| Nuts and seeds                             | 8,517         | 1          | 1          | 98         | 3             | 3          | 95        | 15           | 53         | 32        | 20         | 41         | 40        |
| Vegetables                                 | 11,850        | 7          | 84         | 9          | 3             | 93         | 5         | 10           | 86         | 4         | 32         | 31         | 37        |
| <b>Meat and meat products</b>              | <i>12,374</i> | <i>23</i>  | <i>23</i>  | <i>54</i>  | <i>11</i>     | <i>35</i>  | <i>54</i> | <i>7</i>     | <i>87</i>  | <i>7</i>  | <i>4</i>   | <i>16</i>  | <i>80</i> |
| Meat alternatives                          | 400           | 48         | 23         | 29         | 12            | 79         | 10        | 9            | 88         | 3         | 11         | 32         | 57        |
| Processed meat                             | 11,974        | 22         | 23         | 55         | 11            | 34         | 55        | 7            | 87         | 7         | 4          | 15         | 81        |
| <b>Sauces, dressings and spreads</b>       | <i>18,805</i> | <i>11</i>  | <i>46</i>  | <i>42</i>  | <i>6</i>      | <i>60</i>  | <i>34</i> | <i>22</i>    | <i>49</i>  | <i>29</i> | <i>11</i>  | <i>12</i>  | <i>77</i> |
| Mayonnaise and salad dressings             | 4,182         | 5          | 19         | 75         | 9             | 31         | 60        | 23           | 43         | 33        | 7          | 12         | 82        |
| Sauces                                     | 8,682         | 16         | 68         | 16         | 4             | 83         | 13        | 21           | 44         | 35        | 9          | 13         | 78        |
| Spreads                                    | 5,941         | 9          | 33         | 58         | 7             | 47         | 45        | 24           | 58         | 17        | 16         | 11         | 73        |
| <b>Seafood and seafood products</b>        | <i>4,876</i>  | <i>25</i>  | <i>47</i>  | <i>28</i>  | <i>17</i>     | <i>66</i>  | <i>18</i> | <i>3</i>     | <i>96</i>  | <i>1</i>  | <i>25</i>  | <i>19</i>  | <i>56</i> |
| Canned seafood                             | 1,532         | 29         | 41         | 31         | 21            | 56         | 23        | 4            | 95         | 1         | 20         | 5          | 76        |
| Chilled and frozen seafood                 | 3,344         | 23         | 50         | 27         | 15            | 70         | 15        | 3            | 96         | 1         | 28         | 25         | 47        |
| <b>Snack foods</b>                         | <i>11464</i>  | <i>8</i>   | <i>6</i>   | <i>86</i>  | <i>13</i>     | <i>20</i>  | <i>67</i> | <i>15</i>    | <i>62</i>  | <i>23</i> | <i>10</i>  | <i>7</i>   | <i>83</i> |

**Supplementary Table 4: Nutrient levels per 100g for US products that receive a “Red” traffic light rating**

|                         | <u>All products receiving "Red" traffic light</u> |             |              | <u>Products with “Red” traffic lights due to exceeding serving size cut-offs</u> |          |             |              | <u>Products with “Red” traffic lights due to exceeding only per 100g criteria</u> |          |             |              |
|-------------------------|---------------------------------------------------|-------------|--------------|----------------------------------------------------------------------------------|----------|-------------|--------------|-----------------------------------------------------------------------------------|----------|-------------|--------------|
|                         | <b>N</b>                                          | <b>Mean</b> | <b>Range</b> | <b>N</b>                                                                         | <b>%</b> | <b>Mean</b> | <b>Range</b> | <b>N</b>                                                                          | <b>%</b> | <b>Mean</b> | <b>Range</b> |
| <b><i>Food</i></b>      |                                                   |             |              |                                                                                  |          |             |              |                                                                                   |          |             |              |
| Total fat (g/100g)      | 87,889                                            | 25.1        | 3.1-100      | 29,567                                                                           | 34       | 12.8        | 3.1-17.5     | 58,322                                                                            | 66       | 31.4        | 17.6-100     |
| Saturated fat (g/100g)  | 82,943                                            | 9.5         | 0.4-71.4     | 23,897                                                                           | 29       | 3.7         | 0.4-5.0      | 59,046                                                                            | 71       | 11.9        | 5.1-71.4     |
| Sugar (g/100g)          | 63,710                                            | 34.9        | 1.3-100      | 18,589                                                                           | 29       | 16.9        | 1.3-22.5     | 45,121                                                                            | 71       | 42.2        | 22.6-100     |
| Sodium (mg/100g)        | 88,093                                            | 740         | 30-31636     | 47,536                                                                           | 54       | 429         | 30-600       | 40,557                                                                            | 46       | 1105        | 601-31636    |
| <b><i>Beverages</i></b> |                                                   |             |              |                                                                                  |          |             |              |                                                                                   |          |             |              |
| Total fat (g/100g)      | 1,540                                             | 15.7        | 2.3-60       | 92                                                                               | 6        | 4.6         | 2.3-8.2      | 1,448                                                                             | 94       | 16.4        | 8.8-60       |
| Saturated fat (g/100g)  | 2,331                                             | 7.6         | 0.3-50       | 644                                                                              | 28       | 2.0         | 0.3-2.5      | 1,687                                                                             | 72       | 9.7         | 2.6-50       |
| Sugar (g/100g)          | 7,031                                             | 21.7        | 0.5-100      | 3,472                                                                            | 49       | 8.5         | 0.5-11.25    | 3,559                                                                             | 51       | 34.6        | 11.3-100     |
| Sodium (mg/100g)        | 1,058                                             | 640         | 78-3000      | 223                                                                              | 21       | 211         | 78-299       | 835                                                                               | 79       | 754         | 302-3000     |

**Supplementary Table 5: Nutrient levels per 100g for US products that receive a “Red” traffic light rating by food subcategory**

|                                          | All products receiving "Red" traffic light |      |           | Products with “Red” traffic lights due to exceeding only per 100g criteria |    |      |           | Products with “Red” traffic lights due to exceeding serving size cut-offs |    |      |           |
|------------------------------------------|--------------------------------------------|------|-----------|----------------------------------------------------------------------------|----|------|-----------|---------------------------------------------------------------------------|----|------|-----------|
|                                          | N                                          | Mean | Range     | N                                                                          | %  | Mean | Range     | N                                                                         | %  | Mean | Range     |
| <b><i>Beverages</i></b>                  |                                            |      |           |                                                                            |    |      |           |                                                                           |    |      |           |
| Total fat (g/100g)                       | 525                                        | 17.4 | 2.7-56.3  | 514                                                                        | 98 | 17.7 | 8.8-56.3  | 11                                                                        | 2  | 4.3  | 2.7-7.1   |
| Saturated fat (g/100g)                   | 691                                        | 11.5 | 0.3-37.5  | 649                                                                        | 94 | 12.1 | 2.6-37.5  | 42                                                                        | 6  | 1.5  | 0.3-2.5   |
| Sugar (g/100g)                           | 5,204                                      | 21.2 | 0.8-100   | 2,450                                                                      | 47 | 35.3 | 11.3-100  | 2,754                                                                     | 53 | 8.6  | 0.8-11.25 |
| Sodium (mg/100g)                         | 885                                        | 684  | 78-3000   | 709                                                                        | 80 | 796  | 302-3000  | 176                                                                       | 20 | 233  | 78-299    |
| <b><i>Bread and bakery products</i></b>  |                                            |      |           |                                                                            |    |      |           |                                                                           |    |      |           |
| Total fat (g/100g)                       | 18,459                                     | 19.0 | 3.1-75.0  | 10,330                                                                     | 56 | 23.5 | 17.6-75.0 | 8,129                                                                     | 44 | 13.4 | 3.1-17.5  |
| Saturated fat (g/100g)                   | 16,800                                     | 8.4  | 0.5-52.2  | 11,981                                                                     | 71 | 10.2 | 5.1-52.2  | 4,819                                                                     | 29 | 3.8  | 0.5-5.0   |
| Sugar (g/100g)                           | 16,065                                     | 31.8 | 2.7-97.0  | 12,954                                                                     | 81 | 35.2 | 22.6-97.0 | 3,111                                                                     | 19 | 17.6 | 2.7-22.5  |
| Sodium (mg/100g)                         | 17,029                                     | 521  | 129-3069  | 3,970                                                                      | 23 | 839  | 601-3069  | 13,059                                                                    | 77 | 425  | 129-600   |
| <b><i>Cereal and cereal products</i></b> |                                            |      |           |                                                                            |    |      |           |                                                                           |    |      |           |
| Total fat (g/100g)                       | 3,637                                      | 17.9 | 5.5-53.6  | 1,525                                                                      | 42 | 25.3 | 17.6-53.6 | 2,112                                                                     | 58 | 12.5 | 5.5-17.5  |
| Saturated fat (g/100g)                   | 3,084                                      | 6.1  | 1.9-40.7  | 1,475                                                                      | 48 | 8.7  | 5.1-40.7  | 1,609                                                                     | 52 | 3.7  | 1.9-5.0   |
| Sugar (g/100g)                           | 5,138                                      | 27.4 | 8.2-75.0  | 3,356                                                                      | 65 | 32.4 | 22.6-75.0 | 1,782                                                                     | 35 | 18.0 | 8.2-22.5  |
| Sodium (mg/100g)                         | 4,800                                      | 682  | 218-6000  | 1,940                                                                      | 40 | 1041 | 601-6000  | 2,860                                                                     | 60 | 439  | 218-600   |
| <b><i>Confectionery</i></b>              |                                            |      |           |                                                                            |    |      |           |                                                                           |    |      |           |
| Total fat (g/100g)                       | 9,548                                      | 28.9 | 8.8-100   | 8,309                                                                      | 87 | 31.2 | 17.6-100  | 1,239                                                                     | 13 | 13.5 | 8.8-17.5  |
| Saturated fat (g/100g)                   | 9,987                                      | 16.1 | 0.6-64.3  | 9,223                                                                      | 92 | 17.1 | 5.1-64.3  | 764                                                                       | 8  | 3.9  | 0.6-5.0   |
| Sugar (g/100g)                           | 14,920                                     | 53.4 | 2.6-100   | 14,566                                                                     | 98 | 54.3 | 22.6-100  | 354                                                                       | 2  | 17.5 | 2.6-22.5  |
| Sodium (mg/100g)                         | 1,151                                      | 503  | 302-2422  | 237                                                                        | 21 | 914  | 604-2422  | 914                                                                       | 79 | 397  | 302-600   |
| <b><i>Convenience foods</i></b>          |                                            |      |           |                                                                            |    |      |           |                                                                           |    |      |           |
| Total fat (g/100g)                       | 4,707                                      | 13.7 | 3.5-64.3  | 811                                                                        | 17 | 23.1 | 17.6-64.3 | 3,896                                                                     | 83 | 11.8 | 3.5-17.5  |
| Saturated fat (g/100g)                   | 5,303                                      | 5.0  | 1.0-24.2  | 1,870                                                                      | 35 | 7.4  | 5.1-24.2  | 3,433                                                                     | 65 | 3.6  | 1.0-5.0   |
| Sugar (g/100g)                           | 565                                        | 18.4 | 7.3-63.3  | 112                                                                        | 20 | 31.7 | 22.7-63.3 | 453                                                                       | 80 | 15.1 | 7.3-22.2  |
| Sodium (mg/100g)                         | 9,945                                      | 693  | 110-29000 | 2,651                                                                      | 27 | 1453 | 601-29000 | 7,294                                                                     | 73 | 417  | 110-600   |
| <b><i>Dairy</i></b>                      |                                            |      |           |                                                                            |    |      |           |                                                                           |    |      |           |
| Total fat (g/100g)                       | 14,686                                     | 22.3 | 2.3-85.7  | 10,232                                                                     | 70 | 26.6 | 8.9-85.7  | 4,454                                                                     | 30 | 12.5 | 2.3-17.5  |



|                                                   | <u>All products receiving "Red" traffic light</u> |             |              | <u>Products with "Red" traffic lights due to exceeding only per 100g criteria</u> |          |             |              | <u>Products with "Red" traffic lights due to exceeding serving size cut-offs</u> |          |             |              |
|---------------------------------------------------|---------------------------------------------------|-------------|--------------|-----------------------------------------------------------------------------------|----------|-------------|--------------|----------------------------------------------------------------------------------|----------|-------------|--------------|
|                                                   | <b>N</b>                                          | <b>Mean</b> | <b>Range</b> | <b>N</b>                                                                          | <b>%</b> | <b>Mean</b> | <b>Range</b> | <b>N</b>                                                                         | <b>%</b> | <b>Mean</b> | <b>Range</b> |
| Saturated fat (g/100g)                            | 16,952                                            | 12.2        | 0.5-50       | 14,661                                                                            | 86       | 13.6        | 2.6-50.0     | 2,291                                                                            | 14       | 3.1         | 0.5-5.0      |
| Sugar (g/100g)                                    | 10,181                                            | 21.3        | 0.5-100      | 3,986                                                                             | 39       | 28.9        | 11.3-100     | 6,195                                                                            | 61       | 16.5        | 0.5-22.5     |
| Sodium (mg/100g)                                  | 9,452                                             | 784         | 81-3929      | 7,066                                                                             | 75       | 898         | 325-3929     | 2,386                                                                            | 25       | 446         | 81-600       |
| <b><i>Edible oils</i></b>                         |                                                   |             |              |                                                                                   |          |             |              |                                                                                  |          |             |              |
| Total fat (g/100g)                                | 356                                               | 68.9        | 20-100       | 356                                                                               | 100      | 68.9        | 20.0-100     | -                                                                                | -        | -           | -            |
| Saturated fat (g/100g)                            | 355                                               | 31.2        | 3.6-71.4     | 354                                                                               | 100      | 31.2        | 7.1-71.4     | 1                                                                                | 0        | 3.6         | -            |
| Sugar (g/100g)                                    | 22                                                | 27.4        | 12.5-47.5    | 14                                                                                | 64       | 32.2        | 24.1-47.5    | 8                                                                                | 36       | 17.3        | 12.5-21.4    |
| Sodium (mg/100g)                                  | 259                                               | 693         | 306-1950     | 209                                                                               | 81       | 746         | 607-1950     | 50                                                                               | 19       | 471         | 306-579      |
| <b><i>Seafood and seafood products</i></b>        |                                                   |             |              |                                                                                   |          |             |              |                                                                                  |          |             |              |
| Total fat (g/100g)                                | 1,378                                             | 14.3        | 7.9-84.9     | 280                                                                               | 20       | 22.9        | 17.6-84.9    | 1,098                                                                            | 80       | 12.1        | 7.9-17.5     |
| Saturated fat (g/100g)                            | 859                                               | 4.4         | 2.5-25.9     | 182                                                                               | 21       | 7.9         | 5.1-25.9     | 677                                                                              | 79       | 3.5         | 2.5-5.0      |
| Sugar (g/100g)                                    | 38                                                | 15.6        | 11.5-38.3    | 3                                                                                 | 8        | 30.1        | 25-38.3      | 35                                                                               | 92       | 14.3        | 11.5-20.0    |
| Sodium (mg/100g)                                  | 2,733                                             | 712         | 265-10625    | 825                                                                               | 30       | 1365        | 602-10625    | 1,908                                                                            | 70       | 429         | 265-600      |
| <b><i>Fruit, vegetables, nuts and legumes</i></b> |                                                   |             |              |                                                                                   |          |             |              |                                                                                  |          |             |              |
| Total fat (g/100g)                                | 10,034                                            | 40.5        | 6.5-100      | 8,779                                                                             | 87       | 44.4        | 17.6-100     | 1,255                                                                            | 13       | 13.1        | 6.5-17.5     |
| Saturated fat (g/100g)                            | 9,231                                             | 7.1         | 1.3-66.7     | 6,110                                                                             | 66       | 8.7         | 5.1-66.7     | 3,121                                                                            | 34       | 3.8         | 1.3-5.0      |
| Sugar (g/100g)                                    | 8,258                                             | 36.8        | 8.5-95.2     | 5,612                                                                             | 68       | 46.8        | 22.6-95.2    | 2,646                                                                            | 32       | 15.6        | 8.5-22.5     |
| Sodium (mg/100g)                                  | 8,042                                             | 679         | 260-31636    | 2,619                                                                             | 33       | 1255        | 601-31636    | 5,423                                                                            | 67       | 401         | 260-600      |
| <b><i>Meat and meat products</i></b>              |                                                   |             |              |                                                                                   |          |             |              |                                                                                  |          |             |              |
| Total fat (g/100g)                                | 6,731                                             | 22.1        | 5.1-100      | 4,188                                                                             | 62       | 27.9        | 17.6-100     | 2,543                                                                            | 38       | 12.6        | 5.1-17.5     |
| Saturated fat (g/100g)                            | 6,641                                             | 8.0         | 0.4-38.5     | 4,658                                                                             | 70       | 9.9         | 5.1-38.5     | 1,983                                                                            | 30       | 3.6         | 0.4-5.0      |
| Sugar (g/100g)                                    | 825                                               | 19.8        | 7.5-57.1     | 201                                                                               | 24       | 28.9        | 22.6-57.1    | 624                                                                              | 76       | 16.9        | 7.5-22.2     |
| Sodium (mg/100g)                                  | 9,892                                             | 959         | 30-8375      | 7,604                                                                             | 77       | 1108        | 601-8375     | 2,288                                                                            | 23       | 463         | 30-600       |
| <b><i>Sauces, dressings and spreads</i></b>       |                                                   |             |              |                                                                                   |          |             |              |                                                                                  |          |             |              |
| Total fat (g/100g)                                | 7,982                                             | 32.1        | 6.8-100      | 5,802                                                                             | 73       | 39.3        | 17.6-100     | 2,180                                                                            | 27       | 13.0        | 6.8-17.5     |
| Saturated fat (g/100g)                            | 6,346                                             | 7.1         | 2.1-64.2     | 3,841                                                                             | 61       | 9.3         | 5.1-64.3     | 2,505                                                                            | 39       | 3.8         | 2.1-5.0      |
| Sugar (g/100g)                                    | 5,474                                             | 25.6        | 7.6-100      | 2,647                                                                             | 48       | 35.4        | 22.6-100     | 2,827                                                                            | 52       | 16.3        | 7.6-22.5     |
| Sodium (mg/100g)                                  | 14,510                                            | 939         | 216-19286    | 7,779                                                                             | 54       | 1366        | 601-19286    | 6,731                                                                            | 46       | 445         | 216-600      |

|                           | <u>All products receiving "Red" traffic light</u> |      |          | <u>Products with "Red" traffic lights due to exceeding only per 100g criteria</u> |    |      |           | <u>Products with "Red" traffic lights due to exceeding serving size cut-offs</u> |    |      |          |
|---------------------------|---------------------------------------------------|------|----------|-----------------------------------------------------------------------------------|----|------|-----------|----------------------------------------------------------------------------------|----|------|----------|
|                           | N                                                 | Mean | Range    | N                                                                                 | %  | Mean | Range     | N                                                                                | %  | Mean | Range    |
| <b><i>Snack foods</i></b> |                                                   |      |          |                                                                                   |    |      |           |                                                                                  |    |      |          |
| Total fat (g/100g)        | 9,888                                             | 26.0 | 7.6-91.7 | 8,119                                                                             | 82 | 28.8 | 17.6-91.7 | 1,769                                                                            | 18 | 13.3 | 7.6-17.5 |
| Saturated fat (g/100g)    | 7,640                                             | 7.8  | 1.8-60   | 4,785                                                                             | 63 | 10.2 | 5.1-60    | 2,855                                                                            | 37 | 3.7  | 1.8-5.0  |
| Sugar (g/100g)            | 2,592                                             | 35.1 | 8.9-98.9 | 1,948                                                                             | 75 | 41.3 | 22.6-98.9 | 644                                                                              | 25 | 16.4 | 8.9-22.5 |
| Sodium (mg/100g)          | 9,564                                             | 751  | 202-7800 | 5,733                                                                             | 60 | 952  | 601-7800  | 3,831                                                                            | 40 | 449  | 202-600  |

**Supplementary table 6: Proportion of traffic light color combinations for each major food category**

| Food category |            |       |       | Beverages<br>n=7075 | Bread and<br>bakery<br>n=26804 | Cereal and<br>cereal products<br>n=8855 | Confectionery<br>n=15394 | Convenience<br>foods<br>n=14375 | Dairy<br>n=25815 | Edible oils<br>n=357 |
|---------------|------------|-------|-------|---------------------|--------------------------------|-----------------------------------------|--------------------------|---------------------------------|------------------|----------------------|
| TOTAL<br>FAT  | SAT<br>FAT | SUGAR | SALT  | %                   | %                              | %                                       | %                        | %                               | %                | %                    |
| AMBER         | AMBER      | AMBER | AMBER | 0                   | 0                              | 0                                       | 0                        | 0                               | 0                | 0                    |
| AMBER         | AMBER      | AMBER | GREEN | 0                   | 0                              | 0                                       | 0                        | 0                               | 2                | 0                    |
| AMBER         | AMBER      | AMBER | RED   | 0                   | 0                              | 1                                       | 0                        | 1                               | 0                | 0                    |
| AMBER         | AMBER      | GREEN | AMBER | 0                   | 0                              | 0                                       | 0                        | 2                               | 0                | 0                    |
| AMBER         | AMBER      | GREEN | GREEN | 0                   | 0                              | 1                                       | 0                        | 0                               | 0                | 0                    |
| AMBER         | AMBER      | GREEN | RED   | 0                   | 1                              | 1                                       | 0                        | 6                               | 0                | 0                    |
| AMBER         | AMBER      | RED   | AMBER | 0                   | 0                              | 1                                       | 0                        | 0                               | 0                | 0                    |
| AMBER         | AMBER      | RED   | GREEN | 1                   | 0                              | 0                                       | 0                        | 0                               | 2                | 0                    |
| AMBER         | AMBER      | RED   | RED   | 0                   | 0                              | 1                                       | 0                        | 0                               | 0                | 0                    |
| AMBER         | GREEN      | AMBER | AMBER | 0                   | 0                              | 0                                       | 0                        | 1                               | 0                | 0                    |
| AMBER         | GREEN      | AMBER | GREEN | 0                   | 0                              | 0                                       | 0                        | 0                               | 0                | 0                    |
| AMBER         | GREEN      | AMBER | RED   | 0                   | 5                              | 1                                       | 0                        | 1                               | 0                | 0                    |
| AMBER         | GREEN      | GREEN | AMBER | 0                   | 0                              | 1                                       | 0                        | 3                               | 0                | 0                    |
| AMBER         | GREEN      | GREEN | GREEN | 0                   | 0                              | 4                                       | 0                        | 0                               | 0                | 0                    |
| AMBER         | GREEN      | GREEN | RED   | 0                   | 5                              | 3                                       | 0                        | 7                               | 0                | 0                    |
| AMBER         | GREEN      | RED   | AMBER | 0                   | 0                              | 4                                       | 0                        | 0                               | 0                | 0                    |
| AMBER         | GREEN      | RED   | GREEN | 1                   | 0                              | 1                                       | 1                        | 0                               | 1                | 0                    |
| AMBER         | GREEN      | RED   | RED   | 1                   | 1                              | 12 <sup>a</sup>                         | 0                        | 0                               | 0                | 0                    |
| AMBER         | RED        | AMBER | AMBER | 0                   | 0                              | 0                                       | 0                        | 0                               | 0                | 0                    |
| AMBER         | RED        | AMBER | GREEN | 0                   | 0                              | 0                                       | 0                        | 0                               | 3                | 0                    |
| AMBER         | RED        | AMBER | RED   | 0                   | 0                              | 1                                       | 0                        | 1                               | 0                | 0                    |
| AMBER         | RED        | GREEN | AMBER | 0                   | 0                              | 0                                       | 0                        | 2                               | 0                | 0                    |
| AMBER         | RED        | GREEN | GREEN | 0                   | 0                              | 0                                       | 0                        | 0                               | 1                | 0                    |
| AMBER         | RED        | GREEN | RED   | 0                   | 1                              | 2                                       | 0                        | 7                               | 1                | 0                    |

| Food category |            |       |       | Beverages<br>n=7075 | Bread and<br>bakery<br>n=26804 | Cereal and<br>cereal products<br>n=8855 | Confectionery<br>n=15394 | Convenience<br>foods<br>n=14375 | Dairy<br>n=25815 | Edible oils<br>n=357 |
|---------------|------------|-------|-------|---------------------|--------------------------------|-----------------------------------------|--------------------------|---------------------------------|------------------|----------------------|
| TOTAL<br>FAT  | SAT<br>FAT | SUGAR | SALT  | %                   | %                              | %                                       | %                        | %                               | %                | %                    |
| AMBER         | RED        | RED   | AMBER | 0                   | 1                              | 0                                       | 1                        | 0                               | 1                | 0                    |
| AMBER         | RED        | RED   | GREEN | 1                   | 0                              | 0                                       | 3                        | 0                               | 5                | 0                    |
| AMBER         | RED        | RED   | RED   | 2                   | 1                              | 2                                       | 0                        | 0                               | 0                | 0                    |
| GREEN         | AMBER      | AMBER | AMBER | 0                   | 0                              | 0                                       | 0                        | 0                               | 0                | 0                    |
| GREEN         | AMBER      | AMBER | GREEN | 0                   | 0                              | 0                                       | 0                        | 0                               | 0                | 0                    |
| GREEN         | AMBER      | AMBER | RED   | 0                   | 0                              | 0                                       | 0                        | 0                               | 0                | 0                    |
| GREEN         | AMBER      | GREEN | AMBER | 0                   | 0                              | 0                                       | 0                        | 0                               | 0                | 0                    |
| GREEN         | AMBER      | GREEN | GREEN | 0                   | 0                              | 0                                       | 0                        | 0                               | 0                | 0                    |
| GREEN         | AMBER      | GREEN | RED   | 0                   | 0                              | 0                                       | 0                        | 0                               | 0                | 0                    |
| GREEN         | AMBER      | RED   | AMBER | 0                   | 0                              | 0                                       | 0                        | 0                               | 0                | 0                    |
| GREEN         | AMBER      | RED   | GREEN | 1                   | 0                              | 0                                       | 0                        | 0                               | 1                | 0                    |
| GREEN         | AMBER      | RED   | RED   | 0                   | 0                              | 0                                       | 0                        | 0                               | 0                | 0                    |
| GREEN         | GREEN      | AMBER | AMBER | 0                   | 0                              | 0                                       | 0                        | 1                               | 0                | 0                    |
| GREEN         | GREEN      | AMBER | GREEN | 11                  | 0                              | 0                                       | 0                        | 0                               | 9                | 0                    |
| GREEN         | GREEN      | AMBER | RED   | 2                   | 3                              | 4                                       | 0                        | 2                               | 0                | 0                    |
| GREEN         | GREEN      | GREEN | AMBER | 0                   | 1                              | 1                                       | 0                        | 13                              | 0                | 0                    |
| GREEN         | GREEN      | GREEN | GREEN | 10                  | 1                              | 3                                       | 1                        | 3                               | 3                | 0                    |
| GREEN         | GREEN      | GREEN | RED   | 1                   | 5                              | 6                                       | 0                        | 14                              | 1                | 0                    |
| GREEN         | GREEN      | RED   | AMBER | 1                   | 0                              | 1                                       | 3                        | 0                               | 1                | 0                    |
| GREEN         | GREEN      | RED   | GREEN | 58 <sup>a</sup>     | 1                              | 1                                       | 26                       | 0                               | 10               | 0                    |
| GREEN         | GREEN      | RED   | RED   | 1                   | 1                              | 5                                       | 1                        | 1                               | 0                | 0                    |
| GREEN         | RED        | AMBER | GREEN | 0                   | 0                              | 0                                       | 0                        | 0                               | 0                | 0                    |
| GREEN         | RED        | AMBER | RED   | 0                   | 0                              | 0                                       | 0                        | 0                               | 0                | 0                    |
| GREEN         | RED        | GREEN | AMBER | 0                   | 0                              | 0                                       | 0                        | 0                               | 0                | 0                    |
| GREEN         | RED        | GREEN | GREEN | 0                   | 0                              | 0                                       | 0                        | 0                               | 0                | 0                    |
| GREEN         | RED        | GREEN | RED   | 0                   | 0                              | 0                                       | 0                        | 0                               | 0                | 0                    |

| Food category |            |       |       | Beverages<br>n=7075 | Bread and<br>bakery<br>n=26804 | Cereal and<br>cereal products<br>n=8855 | Confectionery<br>n=15394 | Convenience<br>foods<br>n=14375 | Dairy<br>n=25815 | Edible oils<br>n=357 |
|---------------|------------|-------|-------|---------------------|--------------------------------|-----------------------------------------|--------------------------|---------------------------------|------------------|----------------------|
| TOTAL<br>FAT  | SAT<br>FAT | SUGAR | SALT  | %                   | %                              | %                                       | %                        | %                               | %                | %                    |
| GREEN         | RED        | RED   | AMBER | 0                   | 0                              | 0                                       | 0                        | 0                               | 0                | 0                    |
| GREEN         | RED        | RED   | GREEN | 0                   | 0                              | 0                                       | 0                        | 0                               | 0                | 0                    |
| GREEN         | RED        | RED   | RED   | 0                   | 0                              | 0                                       | 0                        | 0                               | 0                | 0                    |
| RED           | AMBER      | AMBER | AMBER | 0                   | 0                              | 0                                       | 0                        | 0                               | 0                | 0                    |
| RED           | AMBER      | AMBER | GREEN | 0                   | 0                              | 0                                       | 0                        | 0                               | 0                | 0                    |
| RED           | AMBER      | AMBER | RED   | 0                   | 1                              | 0                                       | 0                        | 0                               | 0                | 0                    |
| RED           | AMBER      | GREEN | AMBER | 0                   | 0                              | 0                                       | 0                        | 0                               | 0                | 0                    |
| RED           | AMBER      | GREEN | GREEN | 0                   | 0                              | 0                                       | 0                        | 0                               | 0                | 0                    |
| RED           | AMBER      | GREEN | RED   | 0                   | 1                              | 0                                       | 0                        | 2                               | 0                | 0                    |
| RED           | AMBER      | RED   | AMBER | 0                   | 1                              | 2                                       | 0                        | 0                               | 0                | 0                    |
| RED           | AMBER      | RED   | GREEN | 0                   | 0                              | 2                                       | 0                        | 0                               | 0                | 0                    |
| RED           | AMBER      | RED   | RED   | 0                   | 1                              | 1                                       | 0                        | 0                               | 0                | 0                    |
| RED           | GREEN      | AMBER | AMBER | 0                   | 0                              | 0                                       | 0                        | 0                               | 0                | 0                    |
| RED           | GREEN      | AMBER | GREEN | 0                   | 0                              | 0                                       | 0                        | 0                               | 0                | 0                    |
| RED           | GREEN      | AMBER | RED   | 0                   | 1                              | 0                                       | 0                        | 0                               | 0                | 0                    |
| RED           | GREEN      | GREEN | AMBER | 0                   | 0                              | 0                                       | 0                        | 0                               | 0                | 0                    |
| RED           | GREEN      | GREEN | GREEN | 0                   | 0                              | 0                                       | 0                        | 0                               | 0                | 0                    |
| RED           | GREEN      | GREEN | RED   | 0                   | 2                              | 0                                       | 0                        | 1                               | 0                | 0                    |
| RED           | GREEN      | RED   | AMBER | 0                   | 1                              | 2                                       | 0                        | 0                               | 0                | 0                    |
| RED           | GREEN      | RED   | GREEN | 0                   | 0                              | 1                                       | 1                        | 0                               | 0                | 0                    |
| RED           | GREEN      | RED   | RED   | 0                   | 1                              | 1                                       | 0                        | 0                               | 0                | 0                    |
| RED           | RED        | AMBER | AMBER | 0                   | 0                              | 0                                       | 0                        | 0                               | 0                | 0                    |
| RED           | RED        | AMBER | GREEN | 0                   | 0                              | 0                                       | 0                        | 0                               | 1                | 1                    |
| RED           | RED        | AMBER | RED   | 0                   | 3                              | 2                                       | 0                        | 2                               | 3                | 2                    |
| RED           | RED        | GREEN | AMBER | 0                   | 1                              | 0                                       | 0                        | 2                               | 2                | 4                    |
| RED           | RED        | GREEN | GREEN | 0                   | 0                              | 0                                       | 1                        | 0                               | 2                | 19                   |

| Food category |            |       |       | Beverages<br>n=7075 | Bread and<br>bakery<br>n=26804 | Cereal and<br>cereal products<br>n=8855 | Confectionery<br>n=15394 | Convenience<br>foods<br>n=14375 | Dairy<br>n=25815 | Edible oils<br>n=357 |
|---------------|------------|-------|-------|---------------------|--------------------------------|-----------------------------------------|--------------------------|---------------------------------|------------------|----------------------|
| TOTAL<br>FAT  | SAT<br>FAT | SUGAR | SALT  | %                   | %                              | %                                       | %                        | %                               | %                | %                    |
| RED           | RED        | GREEN | RED   | 0                   | 5                              | 6                                       | 0                        | 21 <sup>a</sup>                 | 29 <sup>a</sup>  | 67 <sup>a</sup>      |
| RED           | RED        | RED   | AMBER | 1                   | 21                             | 8                                       | 15                       | 0                               | 3                | 1                    |
| RED           | RED        | RED   | GREEN | 1                   | 5                              | 6                                       | 38 <sup>a</sup>          | 0                               | 14               | 1                    |
| RED           | RED        | RED   | RED   | 5                   | 24 <sup>a</sup>                | 6                                       | 5                        | 1                               | 1                | 3                    |

|              |            |       |       | Seafood<br>n=4876 | Foods for<br>specific<br>dietary use<br>n=2053 | Fruit and<br>vegetables<br>n=26840 | Meat and<br>meat<br>alternatives<br>n=12374 | Sauces and<br>spreads<br>n=18805 | Snack foods<br>n=11464 |
|--------------|------------|-------|-------|-------------------|------------------------------------------------|------------------------------------|---------------------------------------------|----------------------------------|------------------------|
| TOTAL<br>FAT | SAT<br>FAT | SUGAR | SALT  | %                 | %                                              | %                                  | %                                           | %                                | %                      |
| AMBER        | AMBER      | AMBER | AMBER | 0                 | 0                                              | 0                                  | 0                                           | 0                                | 0                      |
| AMBER        | AMBER      | AMBER | GREEN | 0                 | 0                                              | 0                                  | 0                                           | 0                                | 0                      |
| AMBER        | AMBER      | AMBER | RED   | 0                 | 0                                              | 0                                  | 1                                           | 0                                | 0                      |
| AMBER        | AMBER      | GREEN | AMBER | 1                 | 0                                              | 0                                  | 0                                           | 0                                | 0                      |
| AMBER        | AMBER      | GREEN | GREEN | 0                 | 0                                              | 0                                  | 1                                           | 0                                | 0                      |
| AMBER        | AMBER      | GREEN | RED   | 4                 | 0                                              | 0                                  | 5                                           | 1                                | 0                      |
| AMBER        | AMBER      | RED   | AMBER | 0                 | 2                                              | 0                                  | 0                                           | 0                                | 0                      |
| AMBER        | AMBER      | RED   | GREEN | 0                 | 1                                              | 0                                  | 0                                           | 0                                | 0                      |
| AMBER        | AMBER      | RED   | RED   | 0                 | 1                                              | 0                                  | 1                                           | 0                                | 0                      |
| AMBER        | GREEN      | AMBER | AMBER | 0                 | 0                                              | 0                                  | 0                                           | 0                                | 0                      |
| AMBER        | GREEN      | AMBER | GREEN | 0                 | 1                                              | 0                                  | 0                                           | 0                                | 0                      |
| AMBER        | GREEN      | AMBER | RED   | 1                 | 0                                              | 0                                  | 1                                           | 1                                | 1                      |
| AMBER        | GREEN      | GREEN | AMBER | 3                 | 0                                              | 0                                  | 1                                           | 1                                | 0                      |
| AMBER        | GREEN      | GREEN | GREEN | 6                 | 2                                              | 0                                  | 1                                           | 0                                | 0                      |

| TOTAL FAT | SAT FAT | SUGAR | SALT  | Seafood | Foods for                   | Fruit and          | Meat and                  | Sauces and      | Snack foods |
|-----------|---------|-------|-------|---------|-----------------------------|--------------------|---------------------------|-----------------|-------------|
|           |         |       |       | n=4876  | specific dietary use n=2053 | vegetables n=26840 | meat alternatives n=12374 | spreads n=18805 | n=11464     |
|           |         |       |       | %       | %                           | %                  | %                         | %               | %           |
| AMBER     | GREEN   | GREEN | RED   | 7       | 1                           | 1                  | 6                         | 3               | 3           |
| AMBER     | GREEN   | RED   | AMBER | 0       | 1                           | 0                  | 0                         | 0               | 0           |
| AMBER     | GREEN   | RED   | GREEN | 0       | 3                           | 0                  | 0                         | 0               | 0           |
| AMBER     | GREEN   | RED   | RED   | 0       | 1                           | 0                  | 2                         | 2               | 1           |
| AMBER     | RED     | AMBER | AMBER | 0       | 0                           | 0                  | 0                         | 0               | 0           |
| AMBER     | RED     | AMBER | GREEN | 0       | 0                           | 0                  | 0                         | 0               | 0           |
| AMBER     | RED     | AMBER | RED   | 0       | 0                           | 0                  | 0                         | 0               | 0           |
| AMBER     | RED     | GREEN | AMBER | 1       | 0                           | 0                  | 0                         | 0               | 0           |
| AMBER     | RED     | GREEN | GREEN | 0       | 0                           | 0                  | 1                         | 0               | 0           |
| AMBER     | RED     | GREEN | RED   | 1       | 0                           | 0                  | 1                         | 1               | 0           |
| AMBER     | RED     | RED   | AMBER | 0       | 2                           | 0                  | 0                         | 0               | 0           |
| AMBER     | RED     | RED   | GREEN | 0       | 0                           | 0                  | 0                         | 0               | 0           |
| AMBER     | RED     | RED   | RED   | 0       | 1                           | 0                  | 0                         | 0               | 0           |
| GREEN     | AMBER   | AMBER | AMBER | 0       | 0                           | 0                  | 0                         | 0               | 0           |
| GREEN     | AMBER   | AMBER | GREEN | 0       | 0                           | 0                  | 0                         | 0               | 0           |
| GREEN     | AMBER   | AMBER | RED   | 0       | 0                           | 0                  | 0                         | 0               | 0           |
| GREEN     | AMBER   | GREEN | AMBER | 0       | 0                           | 0                  | 0                         | 0               | 0           |
| GREEN     | AMBER   | GREEN | GREEN | 0       | 0                           | 0                  | 0                         | 0               | 0           |
| GREEN     | AMBER   | GREEN | RED   | 0       | 0                           | 0                  | 0                         | 0               | 0           |
| GREEN     | AMBER   | RED   | AMBER | 0       | 0                           | 0                  | 0                         | 0               | 0           |
| GREEN     | AMBER   | RED   | GREEN | 0       | 0                           | 0                  | 0                         | 0               | 0           |
| GREEN     | AMBER   | RED   | RED   | 0       | 0                           | 0                  | 0                         | 0               | 0           |
| GREEN     | GREEN   | AMBER | AMBER | 0       | 0                           | 1                  | 0                         | 1               | 0           |
| GREEN     | GREEN   | AMBER | GREEN | 0       | 1                           | 5                  | 0                         | 2               | 0           |
| GREEN     | GREEN   | AMBER | RED   | 1       | 0                           | 1                  | 1                         | 6               | 0           |

|              |         |       |       | Seafood<br>n=4876 | Foods for<br>specific<br>dietary use<br>n=2053 | Fruit and<br>vegetables<br>n=26840 | Meat and<br>meat<br>alternatives<br>n=12374 | Sauces and<br>spreads<br>n=18805 | Snack foods<br>n=11464 |
|--------------|---------|-------|-------|-------------------|------------------------------------------------|------------------------------------|---------------------------------------------|----------------------------------|------------------------|
| TOTAL<br>FAT | SAT FAT | SUGAR | SALT  | %                 | %                                              | %                                  | %                                           | %                                | %                      |
| GREEN        | GREEN   | GREEN | AMBER | 14                | 0                                              | 12                                 | 1                                           | 3                                | 0                      |
| GREEN        | GREEN   | GREEN | GREEN | 11                | 4                                              | 12                                 | 9                                           | 2                                | 1                      |
| GREEN        | GREEN   | GREEN | RED   | 20 <sup>a</sup>   | 1                                              | 9                                  | 10                                          | 15 <sup>a</sup>                  | 2                      |
| GREEN        | GREEN   | RED   | AMBER | 0                 | 1                                              | 1                                  | 0                                           | 1                                | 0                      |
| GREEN        | GREEN   | RED   | GREEN | 0                 | 3                                              | 15 <sup>a</sup>                    | 0                                           | 5                                | 1                      |
| GREEN        | GREEN   | RED   | RED   | 0                 | 1                                              | 1                                  | 1                                           | 12                               | 0                      |
| GREEN        | RED     | AMBER | GREEN | 0                 | 0                                              | 0                                  | 0                                           | 0                                | 0                      |
| GREEN        | RED     | AMBER | RED   | 0                 | 0                                              | 0                                  | 0                                           | 0                                | 0                      |
| GREEN        | RED     | GREEN | AMBER | 0                 | 0                                              | 0                                  | 0                                           | 0                                | 0                      |
| GREEN        | RED     | GREEN | GREEN | 0                 | 0                                              | 0                                  | 0                                           | 0                                | 0                      |
| GREEN        | RED     | GREEN | RED   | 0                 | 0                                              | 0                                  | 0                                           | 0                                | 0                      |
| GREEN        | RED     | RED   | AMBER | 0                 | 0                                              | 0                                  | 0                                           | 0                                | 0                      |
| GREEN        | RED     | RED   | GREEN | 0                 | 0                                              | 0                                  | 0                                           | 0                                | 0                      |
| GREEN        | RED     | RED   | RED   | 0                 | 0                                              | 0                                  | 0                                           | 0                                | 0                      |
| RED          | AMBER   | AMBER | AMBER | 0                 | 0                                              | 0                                  | 0                                           | 0                                | 0                      |
| RED          | AMBER   | AMBER | GREEN | 0                 | 0                                              | 0                                  | 0                                           | 0                                | 0                      |
| RED          | AMBER   | AMBER | RED   | 0                 | 0                                              | 0                                  | 0                                           | 1                                | 2                      |
| RED          | AMBER   | GREEN | AMBER | 2                 | 0                                              | 0                                  | 0                                           | 0                                | 1                      |
| RED          | AMBER   | GREEN | GREEN | 0                 | 1                                              | 0                                  | 0                                           | 0                                | 0                      |
| RED          | AMBER   | GREEN | RED   | 7                 | 1                                              | 0                                  | 2                                           | 3                                | 8                      |
| RED          | AMBER   | RED   | AMBER | 0                 | 2                                              | 0                                  | 0                                           | 0                                | 0                      |
| RED          | AMBER   | RED   | GREEN | 0                 | 2                                              | 0                                  | 0                                           | 0                                | 0                      |
| RED          | AMBER   | RED   | RED   | 0                 | 1                                              | 0                                  | 0                                           | 1                                | 1                      |
| RED          | GREEN   | AMBER | AMBER | 0                 | 0                                              | 0                                  | 0                                           | 0                                | 0                      |
| RED          | GREEN   | AMBER | GREEN | 0                 | 0                                              | 0                                  | 0                                           | 0                                | 0                      |



| TOTAL FAT | SAT FAT | SUGAR | SALT  | Seafood | Foods for specific dietary use | Fruit and vegetables | Meat and meat alternatives | Sauces and spreads | Snack foods     |
|-----------|---------|-------|-------|---------|--------------------------------|----------------------|----------------------------|--------------------|-----------------|
|           |         |       |       | n=4876  | n=2053                         | n=26840              | n=12374                    | n=18805            | n=11464         |
|           |         |       |       | %       | %                              | %                    | %                          | %                  | %               |
| RED       | GREEN   | AMBER | RED   | 0       | 0                              | 0                    | 0                          | 1                  | 2               |
| RED       | GREEN   | GREEN | AMBER | 0       | 0                              | 0                    | 0                          | 0                  | 0               |
| RED       | GREEN   | GREEN | GREEN | 0       | 0                              | 0                    | 0                          | 0                  | 0               |
| RED       | GREEN   | GREEN | RED   | 2       | 0                              | 2                    | 1                          | 3                  | 5               |
| RED       | GREEN   | RED   | AMBER | 0       | 1                              | 0                    | 0                          | 0                  | 0               |
| RED       | GREEN   | RED   | GREEN | 0       | 1                              | 0                    | 0                          | 0                  | 0               |
| RED       | GREEN   | RED   | RED   | 0       | 1                              | 0                    | 0                          | 1                  | 1               |
| RED       | RED     | AMBER | AMBER | 0       | 3                              | 1                    | 0                          | 1                  | 0               |
| RED       | RED     | AMBER | GREEN | 0       | 0                              | 1                    | 0                          | 1                  | 0               |
| RED       | RED     | AMBER | RED   | 1       | 4                              | 3                    | 3                          | 8                  | 9               |
| RED       | RED     | GREEN | AMBER | 4       | 2                              | 2                    | 1                          | 1                  | 2               |
| RED       | RED     | GREEN | GREEN | 1       | 1                              | 7                    | 4                          | 1                  | 1               |
| RED       | RED     | GREEN | RED   | 9       | 5                              | 9                    | 41 <sup>a</sup>            | 14                 | 37 <sup>a</sup> |
| RED       | RED     | RED   | AMBER | 0       | 15                             | 4                    | 0                          | 1                  | 3               |
| RED       | RED     | RED   | GREEN | 0       | 7                              | 5                    | 0                          | 1                  | 2               |
| RED       | RED     | RED   | RED   | 0       | 26 <sup>a</sup>                | 2                    | 1                          | 5                  | 11              |

<sup>a</sup> Most common combination
